# Supplementary material for: Protective effects of Olyset® Net on Plasmodium falciparum infection after three years of distribution in western Kenya
Source: Springer Nature journal article supplement (doi:10.1186/s12936-020-03444-w), 2020-10-19

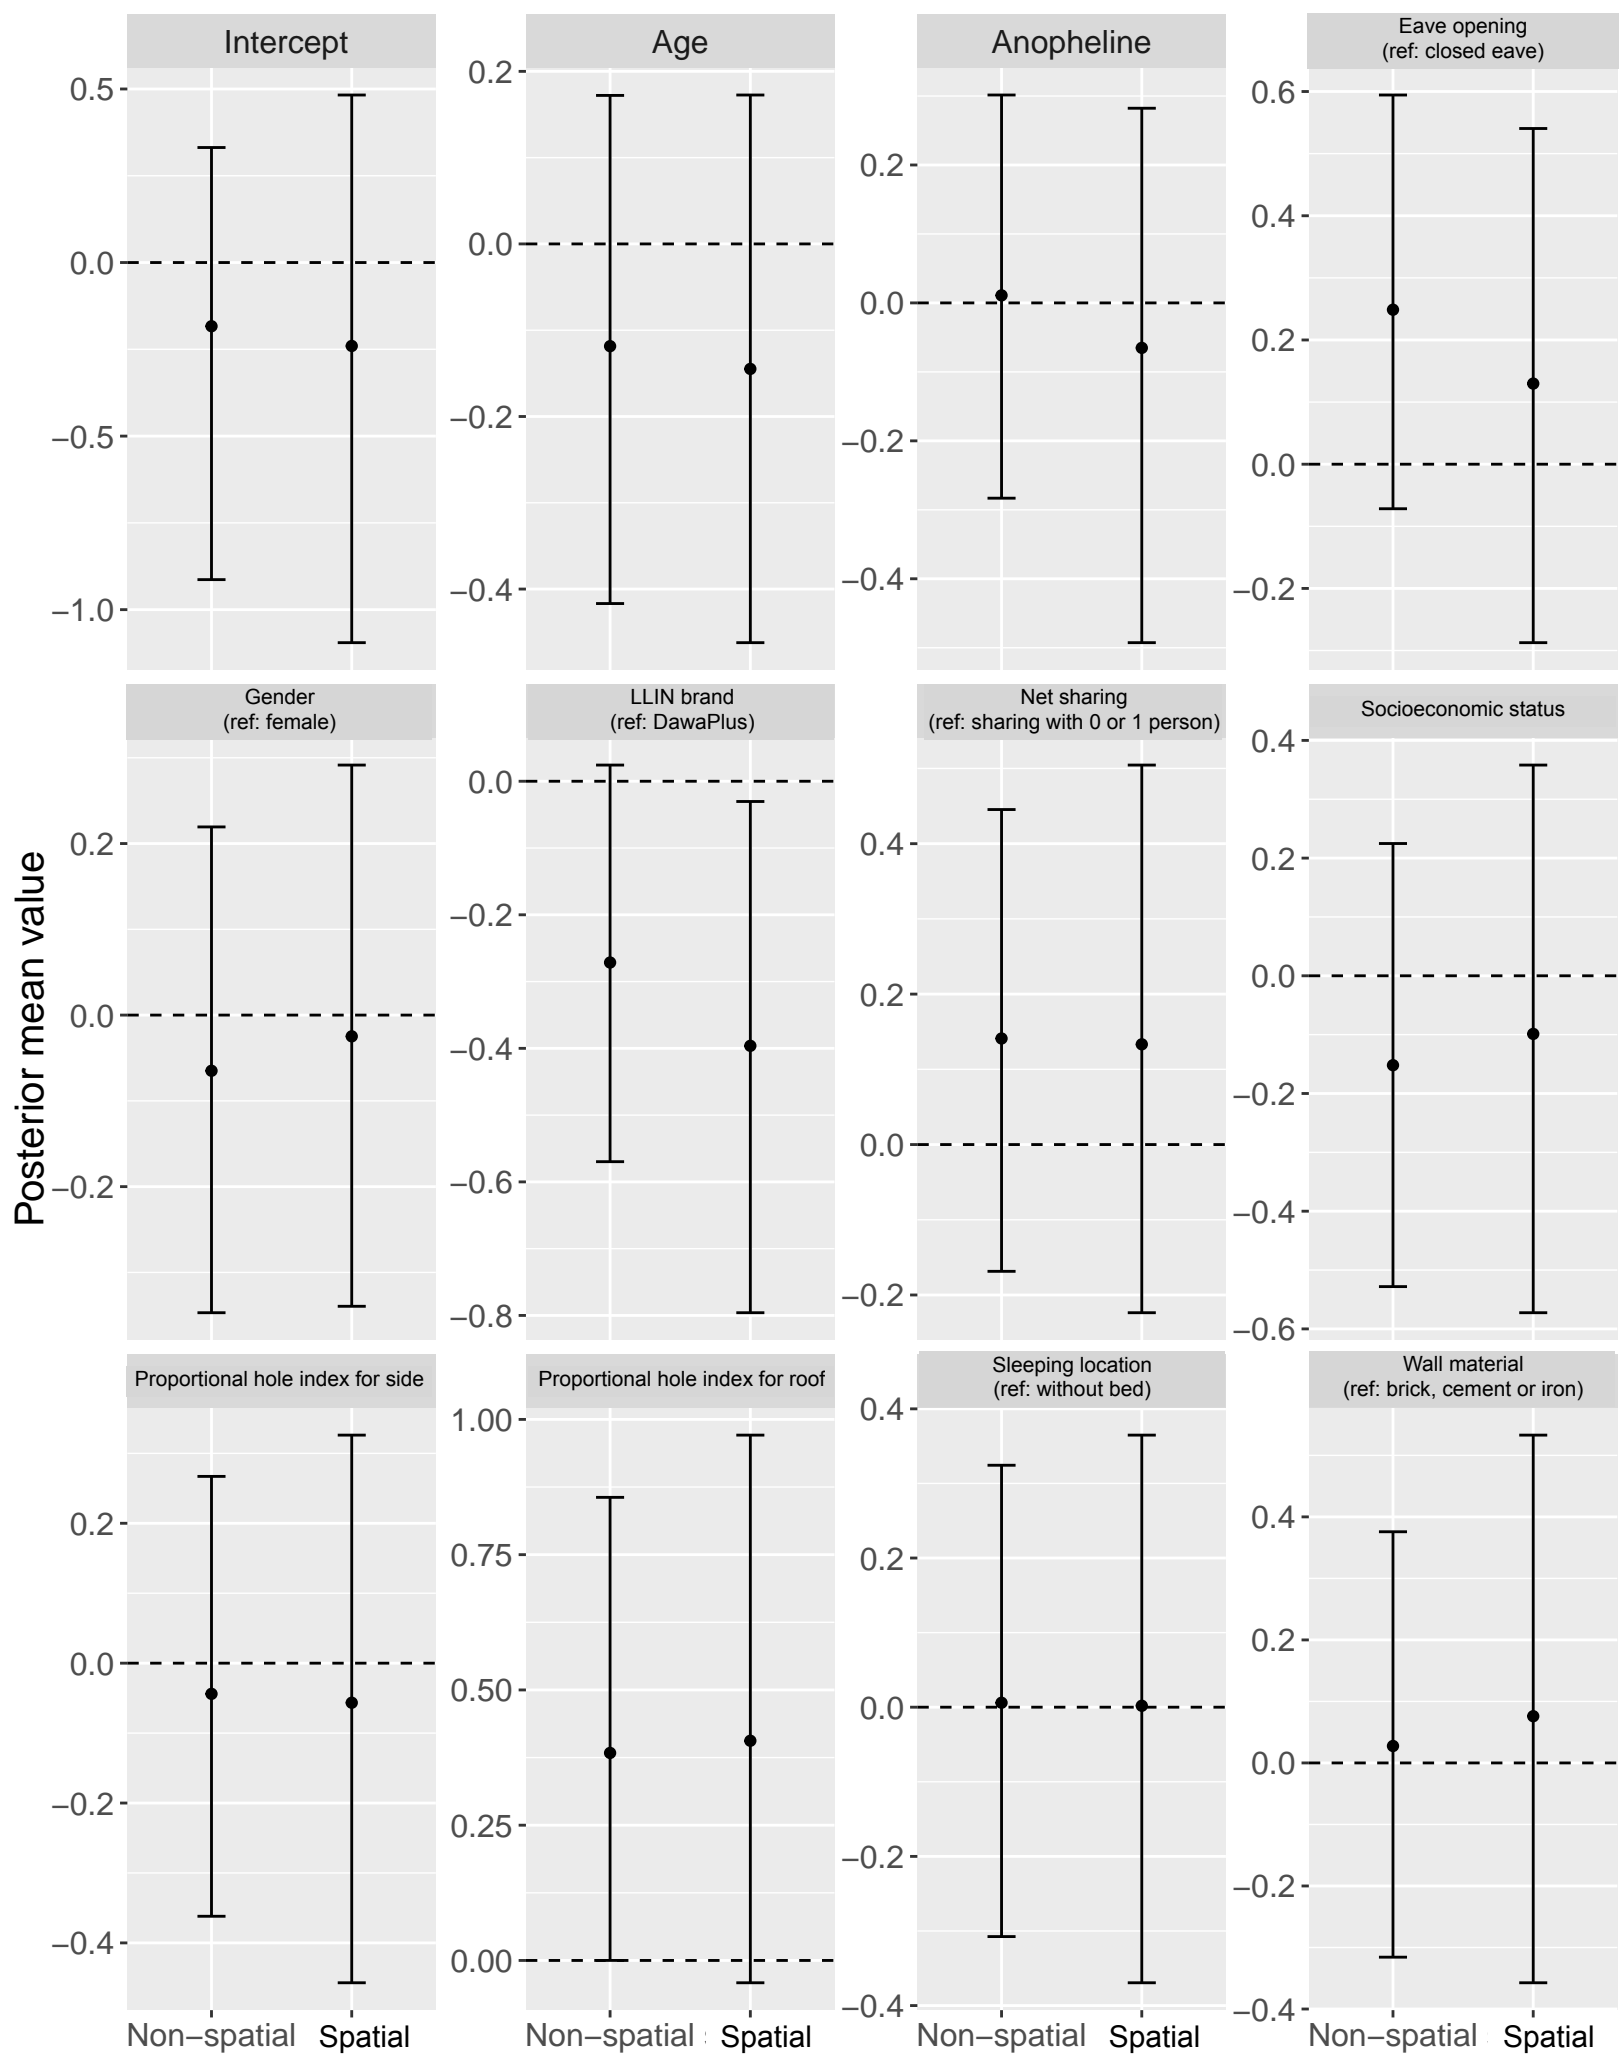

Supplement: MOESM4 [file 18499928]
